# Supplementary material
Source: PubMed Central journal article supplement (PMC9984604)
Supplement: 10278_2022_724_MOESM1_ESM.pdf [file 10278_2022_724_MOESM1_ESM.pdf]

## Supplementary Figure 1

### Image augmentation in the target training of deep learning models

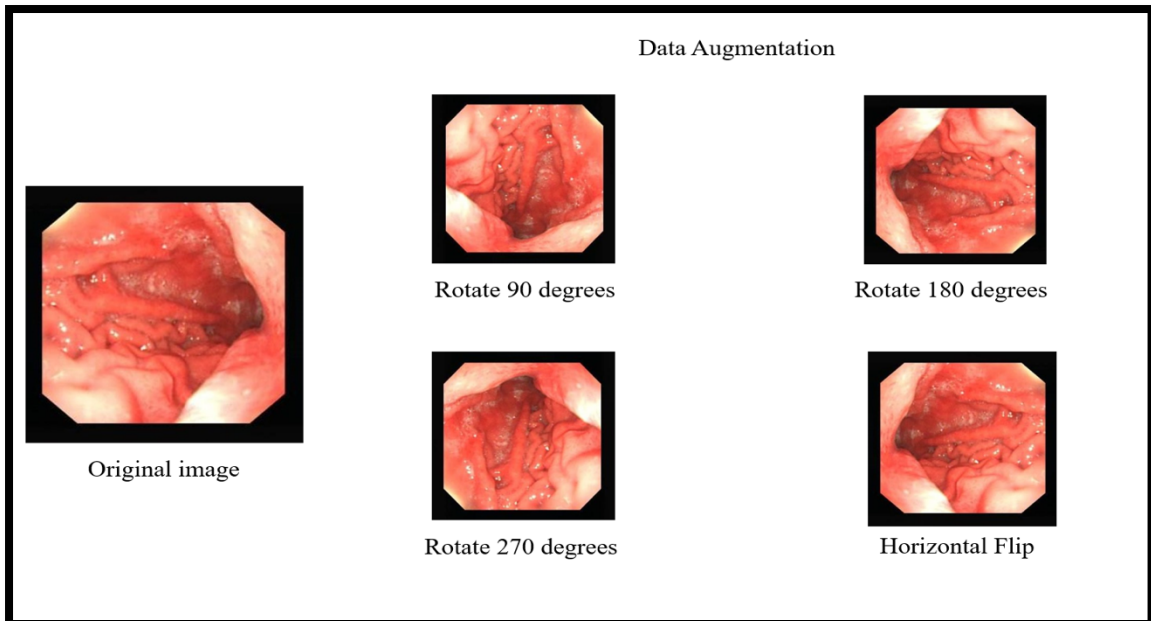

Considering the specialized nature of medical data, we used non-rigid variations for the endoscopic images. Rotational transformation and flip transformation were applied to augmented the data.





## Supplementary Figure 4 partial dependence plots of important variables in AutoML models

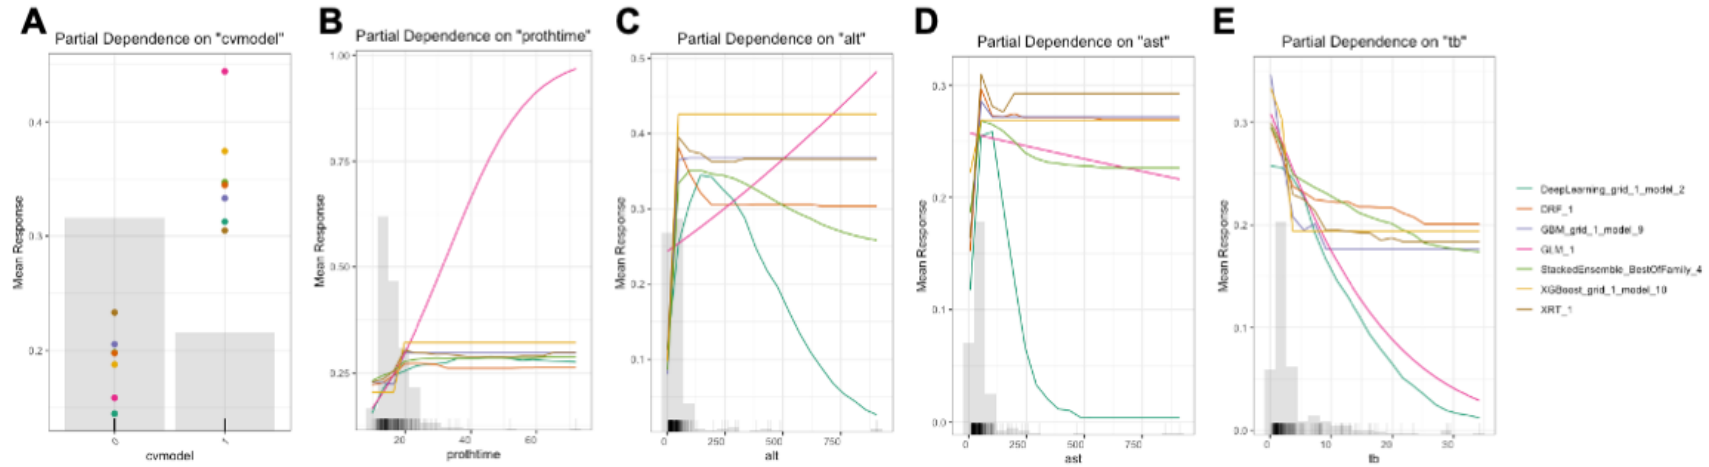

Partial dependence plots of variables in AutoML models: A: EfficientNet model, B: prothrombin time, C: alanine aminotransferase (ALT), D: aspartate aminotransferase (AST), and E: total bilirubin

## Supplementary content 1 AutoML models summary

### 1 The Stacking model

H2OBinomialModel: stackedensemble

Model Key:

StackedEnsemble\_BestOfFamily\_4\_AutoML\_1\_20220313\_114512

Number of Base Models: 6

Base Models (count by algorithm type):

| deeplearning | drf | gbm | glm | xgboost |
|--------------|-----|-----|-----|---------|
| 1            | 2   | 1   | 1   | 1       |

Metalearner:

Metalearner algorithm: glm

Metalearner cross-validation fold assignment:

Fold assignment scheme: AUTO

Number of folds: 5

Fold column: NULL

Metalearner hyperparameters:

H2OBinomialMetrics: stackedensemble

\*\* Reported on training data. \*\*

MSE: 0.0007864432

RMSE: 0.0280436

LogLoss: 0.009931325

Mean Per-Class Error: 0

AUC: 1

AUCPR: 1

Gini: 1

## 2 The Random Forest model

H2OBinomialModel: drf

Model Key: DRF\_1\_AutoML\_1\_20220313\_114512

Model Summary:

number\_of\_trees: 34

number\_of\_internal\_trees: 34

model\_size\_in\_bytes: 12586

min\_depth: 6

max\_depth: 12

mean\_depth: 9.50000

min\_leaves: 19

max\_leaves: 34

mean\_leaves: 24.88235

H2OBinomialMetrics: drf

\*\* Reported on training data. \*\*

\*\* Metrics reported on Out-Of-Bag training samples \*\*

MSE: 0.06475549

RMSE: 0.254471

LogLoss: 0.2090637

Mean Per-Class Error: 0.1170732

AUC: 0.9711498

AUCPR: 0.9154434

Gini: 0.9422997

R<sup>2</sup>: 0.6587363

### 3 The Deep Learning model

H2OBinomialModel: deeplearning

Model Key: DeepLearning\_grid\_1\_AutoML\_1\_20220313\_114512\_model\_2

Status of Neuron Layers: predicting bleed, 2-class classification, bernoulli distribution, CrossEntropy loss, 1,902 weights/biases, 27.6 KB, 517,000 training samples, mini-batch size 1, layers number: 3 (1<sup>st</sup> layer units 35, dropout 5%, ; 2<sup>nd</sup> units 50, droupt 20%, activation = relu; 3<sup>rd</sup> units 3, activation = softmax)

H2OBinomialMetrics: deeplearning

\*\* Reported on training data. \*\*

\*\* Metrics reported on full training frame \*\*

MSE: 5.171595e-05

RMSE: 0.00719138

LogLoss: 0.0008240017

Mean Per-Class Error: 0

AUC: 1

AUCPR: 1

Gini: 1

#### 4 The gradient boosting machine

H2OBinomialModel: gbm

Model Key: GBM\_grid\_1\_AutoML\_1\_20220313\_114512\_model\_9

Model Summary:

number\_of\_trees: 60

number\_of\_internal\_trees: 60

model\_size\_in\_bytes: 7,005

min\_depth: 2

max\_depth: 3

mean\_depth: 2.96667

min\_leaves: 4

max\_leaves: 6

mean\_leaves: 4.61667

H2OBinomialMetrics: gbm

\*\* Reported on training data. \*\*

MSE: 0.02681526

RMSE: 0.1637537

LogLoss: 0.1169887

Mean Per-Class Error: 0.03101045

AUC: 0.9984669

AUCPR: 0.9957289

Gini: 0.9969338

R<sup>2</sup>: 0.8586826



## 5 The general linear model

H2OBinomialModel: glm

Model Key: GLM\_1\_AutoML\_1\_20220313\_114512

GLM Model: summary

Family: binomial

Link: logit

Regularization: Ridge ( lambda = 0.01639 )

lambda\_search

nlambda = 30, lambda.max = 9.4017, lambda.min = 0.01639, lambda.1se = 0.1102

number\_of\_predictors\_total: 27

number\_of\_active\_predictors: 27

number\_of\_iterations: 42

training\_frame: AutoML\_1\_20220313\_114512\_training\_train\_sid\_bc36\_1

H2OBinomialMetrics: glm

\*\* Reported on training data. \*\*

MSE: 0.1135841

RMSE: 0.3370224

LogLoss: 0.3717507

Mean Per-Class Error: 0.1891986

AUC: 0.8758188

AUCPR: 0.7772275

Gini: 0.7516376

R<sup>2</sup>: 0.4014079

Residual Deviance: 204.4629

AIC: 260.4629

## 6 The eXtreme Boosting model

H2OBinomialModel: xgboost

Model Key: XGBoost\_grid\_1\_AutoML\_1\_20220313\_114512\_model\_10

Model Summary:

number\_of\_trees: 37

H2OBinomialMetrics: xgboost

\*\* Reported on training data. \*\*

MSE: 0.07000971

RMSE: 0.2645935

LogLoss: 0.2441295

Mean Per-Class Error: 0.07961672

AUC: 0.9702439

AUCPR: 0.9192149

Gini: 0.9404878

R^2: 0.6310464
